# Supplementary material for: Nonconventional chemical inhibitors of microRNA: therapeutic scope
Source: Royal Society of Chemistry journal article supplement (doi:10.1039/c4cc04514a), 2014-10-09
Supplement: c4cc04514a1.pdf [file c4cc04514a1.pdf]

**Supplementary Table 1- Various Antisense Oligonucleotide approaches for miRNA inhibition**

| S.No | ASO type                                       | Reference                                                        |
|------|------------------------------------------------|------------------------------------------------------------------|
| 1    | 2'-O-methyl (2'-OMe) oligonucleotides          | Hutvagner et al. 2004; Meister et al. 2004; Cheng et al. 2005    |
| 2    | AntagomiRs                                     | Krützfeldt et al. 2005, 2007                                     |
| 3    | 2'-O-Methoxyethyl (2'-MOE) oligonucleotides    | Davis et al. 2006; Esau et al. 2006                              |
| 4    | 2'-fluoro/2'-methoxyethyl mixmers (2'F/MOE)    | Davis et al. 2009                                                |
| 5    | Locked nucleic acids (LNA)                     | Ørom et al. 2006; Elmén et al. 2008a; Lanford et al. 2010        |
| 6    | Peptide Nucleic Acids (PNA)                    | Fabani and Gait 2008; Oh et al. 2009, 2010; Fabani et al. 2010   |
| 7    | Phosphorodiamidate Morpholino oligonucleotides | Kloosterman et al. 2007; Flynt et al. 2007; Eberhart et al. 2008 |

#### References

- Hutvagner G, Simard MJ, Mello CC, Zamore PD. 2004. Sequence-specific inhibition of small RNA function. *PLoS Biol* **2**: e98. doi: 10.1371/journal.pbio.0020098.
- Meister G, Landthaler M, Dorsett Y, Tuschl T. 2004. Sequence-specific inhibition of microRNA- and siRNA-induced RNA silencing. *RNA* **10**: 544–550.
- Cheng AM, Byrom MW, Shelton J, Ford LP. 2005. Antisense inhibition of human miRNAs and indications for an involvement of miRNA in cell growth and apoptosis. *Nucleic Acids Res* **33**: 1290–1297.
- Krützfeldt J, Rajewsky N, Braich R, Rajeev KG, Tuschl T, Manoharan M, Stoffel M. 2005. Silencing of microRNAs in vivo with 'antagomirs.' *Nature* **438**:685–689
- Krützfeldt J, Kuwajima S, Braich R, Rajeev KG, Pena J, Tuschl T, Manoharan M, Stoffel M. 2007. Specificity, duplex degradation and subcellular localization of antagomirs. *Nucleic Acids Res* **35**: 2885–2892.
- Davis S, Lollo B, Freier S, Esau C. 2006. Improved targeting of miRNA with antisense oligonucleotides. *Nucleic Acids Res* **34**: 2294–2304.
- Esau C, Davis S, Murray SF, Yu XX, Pandey SK, Pear M, Watts L, Booten SL, Graham M, McKay R, et al. 2006. miR-122 regulation of lipid metabolism revealed by in vivo antisense targeting. *Cell Metab* **3**: 87–98.
- Davis S, Propp S, Freier SM, Jones LE, Serra MJ, Kinberger G, Bhat B, Swayze EE, Bennett CF, Esau C. 2009. Potent inhibition of microRNA in vivo without degradation. *Nucleic Acids Res* **37**: 70–77.
- Ørom UA, Kauppinen S, Lund AH. 2006. LNA-modified oligonucleotides mediate specific inhibition of microRNA function. *Gene* **372**: 137–141.
- Elmén J, Lindow M, Schütz S, Lawrence M, Petri A, Obad S, Lindholm M, Hedtjörn M, Hansen HF, Berger U, et al. 2008a. LNA-mediated microRNA silencing in non-human primates. *Nature* **452**: 896–899.
- Lanford RE, Hildebrandt-Eriksen ES, Petri A, Persson R, Lindow M, Munk ME, Kauppinen S, Ørom H. 2010. Therapeutic silencing of microRNA-122 in primates with chronic hepatitis C virus infection. *Science* **327**: 198–201.

12. Oh SY, Ju Y, Park H. 2009. A highly effective and long-lasting inhibition of miRNAs with PNA-based antisense oligonucleotides. *Mol Cells* **28**: 341–345.
13. Oh SY, Ju Y, Kim S, Park H. 2010. PNA-based antisense oligonucleotides for microRNAs inhibition in the absence of a transfection reagent. *Oligonucleotides* **20**: 225–230.
14. Fabani MM, Abreu-Goodger C, Williams D, Lyons PA, Torres AG, Smith KGC, Enright AJ, Gait MJ, Vigorito E. 2010. Efficient inhibition of miR-155 function in vivo by peptide nucleic acids. *Nucleic Acids Res* **38**: 4466–4475.
15. Kloosterman WP, Lagendijk AK, Ketting RF, Moulton JD, Plasterk RHA. 2007. Targeted inhibition of miRNA maturation with morpholinos reveals a role for miR-375 in pancreatic islet development. *PLoS Biol* **5**: e203. doi: 10.1371/journal.pbio.0050203.
16. Flynt AS, Li N, Thatcher EJ, Solnica-Krezel L, Patton JG. 2007. Zebrafish miR-214 modulates Hedgehog signaling to specify muscle cell fate. *Nat Genet* **39**:259–263.
17. Eberhart JK, He X, Swartz ME, Yan Y-L, Song H, Boling TC, Kunerth AK, Walker MB, Kimmel CB, Postlethwait JH. 2008. MicroRNA Mirn140 modulates Pdgf signaling during palatogenesis. *Nat Genet* **40**: 290–298.
